# Supplementary material for: Surface-based observations of cold-air outbreak clouds during the COMBLE field campaign
Source: Copernicus journal article supplement (doi:10.5194/acp-23-3561-2023), 2023-03-22
Supplement: Supplementary file 1 [file acp-23-3561-2023-supplement.pdf]

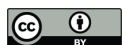

*Supplement of*

## **Surface-based observations of cold-air outbreak clouds during the COMBLE field campaign**

**Zackary Mages et al.**

*Correspondence to:* Zackary Mages ([zackary.mages@stonybrook.edu](mailto:zackary.mages@stonybrook.edu))

The copyright of individual parts of the supplement might differ from the article licence.

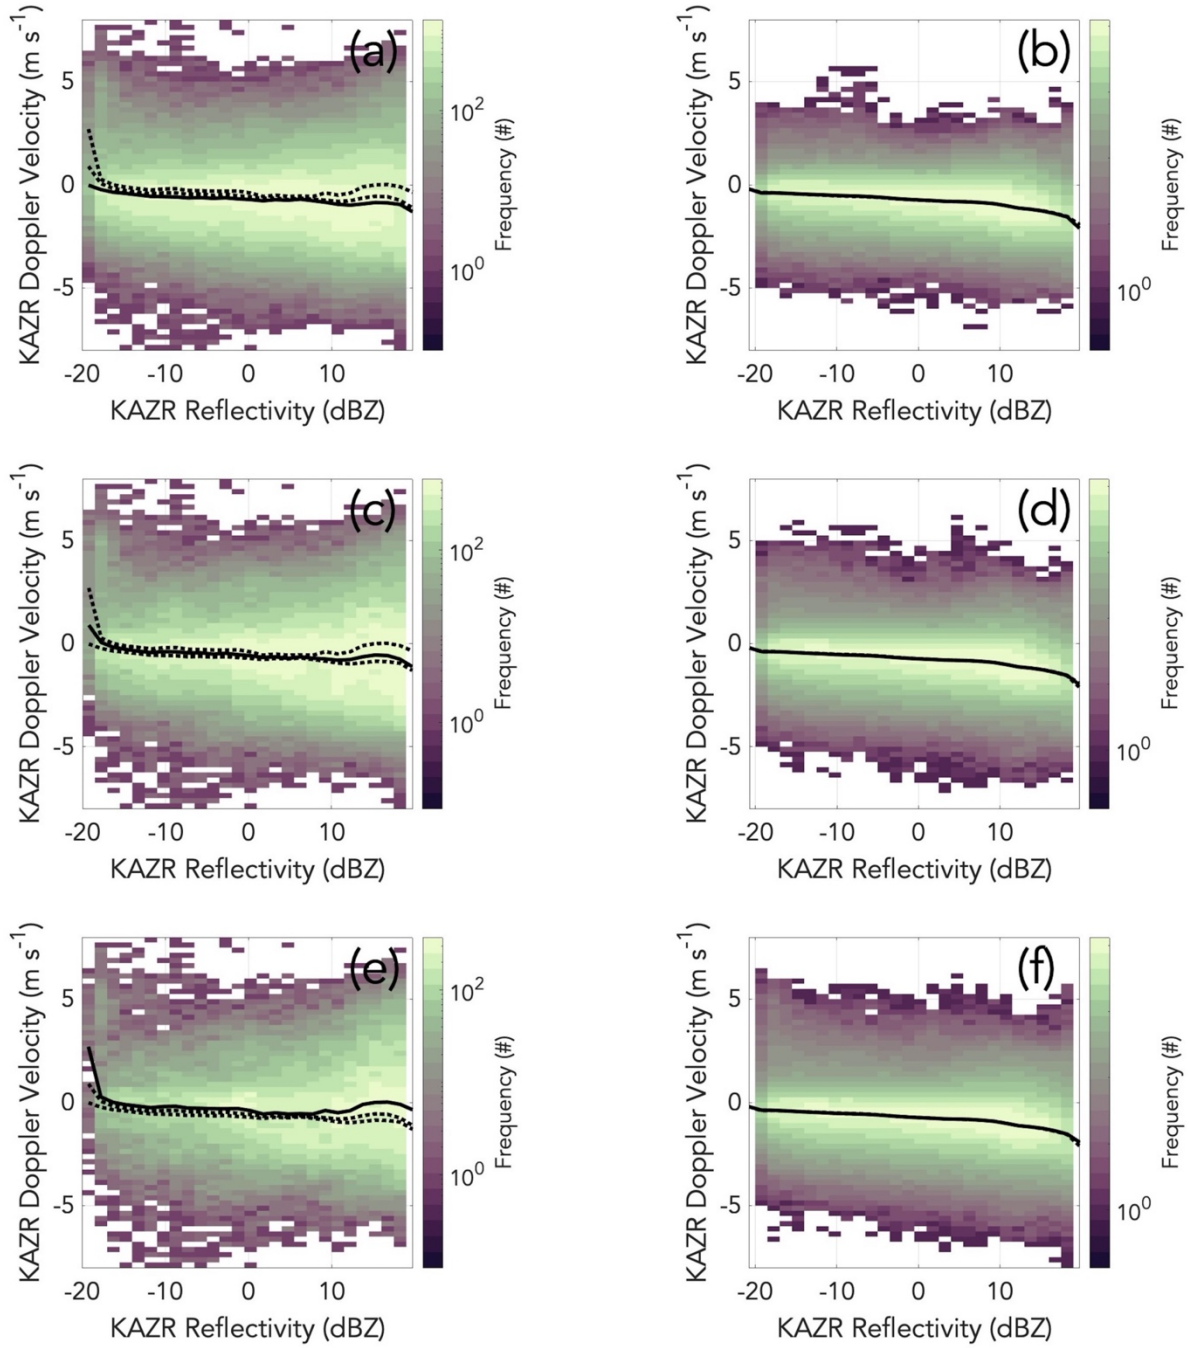

**Figure S1.** For March 28<sup>th</sup>, joint PDFs of KAZR reflectivity and Doppler velocity in the vertical profiles with a liquid water path (LWP) greater than 0.25  $\text{kg m}^{-2}$  (a), less than 0.25  $\text{kg m}^{-2}$  (b), greater than 0.5  $\text{kg m}^{-2}$  (c), less than 0.5  $\text{kg m}^{-2}$  (d), greater than 0.8  $\text{kg m}^{-2}$  (e), and less than 0.8  $\text{kg m}^{-2}$  (f). Solid lines indicate the median Doppler velocity in each reflectivity bin for that LWP threshold, and dashed line indicate the median Doppler velocity in each reflectivity bin for the other two LWP thresholds. Prepared using Cramer (2021).
